# Supplementary material
Source: HighWire-hosted journal article supplement (https://www.rcpjournals.org/highwire/filestream/12768/field_highwire_adjunct_files/8/S6._Employment_status_at_Post_COVID.pdf)
Supplement: S6._Employment_status_at_Post_COVID.pdf [file S6._Employment_status_at_Post_COVID.pdf]

| <i>Number of Patients</i>                                                                          | <b>High-Risk</b> | <b>Low-Risk</b> | <b>Community</b> |
|----------------------------------------------------------------------------------------------------|------------------|-----------------|------------------|
| I did not work before COVID.                                                                       | 54               | 167             | 15               |
| I have not returned to work or I am working reduced hours because of my health since COVID         | 50               | 42              | 42               |
| I have not returned to work or I am working reduced hours but not because of my health since COVID | 23               | 35              | 8                |
| I have returned to work                                                                            | 35               | 110             | 62               |
| Prefer not to say                                                                                  | 7                | 22              | 3                |

## **S6. Employment (return to work) status at Post COVID assessment.**

Patient responses to the question, 'Which of the following best describes your ability to work'. Number of patients reporting each categorical option. Presented separately for patients following high-risk hospitalisation, low-risk hospitalisation and community referrals.
